# Supplementary material
Source: publisher figshare collection journal article supplement (https://sage.figshare.com/ndownloader/files/12714404)
Supplement: Supplementary file 1 [file 12714404]

***Online Supplements for:***  
**Using Bifactor Exploratory Structural Equation Modeling to Test for a Continuum**  
**Structure of Motivation**  
**(doi:10.1177/0149206316645653)**

|                                       |        |
|---------------------------------------|--------|
| 1. ICM-CFA                            | Page 2 |
| 2. Bifactor CFA                       | Page 3 |
| 3. ESEM                               | Page 4 |
| 4. Bifactor ESEM                      | Page 5 |
| 5. Bifactor ESEM with covariates      | Page 7 |
| 5. Bifactor ESEM with ESEM-within-CFA | Page 8 |

Title: 6 Factor CFA;

*! In all input files, statements preceded by ! are annotations.*

*! Use the following statement to identify the data set. Here, the data set is labelled BESEM.dat.*

*! If the data set is not in the same folder as the input file, include the complete path to the data set.*

Data:

File is BESEM.dat;

*! The variables names function identifies all variables in the data set, in order of appearance,*

*! whereas the usevar command identifies the variables used in the analysis.*

Variable:

Names are

Am1 Am5 Am6  
Esap2 Esap4 Esav1  
Emap1 Emap4 Emav4  
Inap1 Inap2 Inav1 Inav2  
Ident1 Ident3 Ident4  
Intrin2 Intrin4 Intrin6;

Usevariable are Am1 Am5 Am6

Esap2 Esap4 Esav1  
Emap1 Emap4 Emav4  
Inap1 Inap2 Inav1 Inav2  
Ident2 Ident3 Ident4  
Intrin2 Intrin4 Intrin6;

*! The next section defines the analysis. Here the Maximum Likelihood Robust (MLR) estimator is used.*

Analysis:

ESTIMATOR = MLR;

*! The next statement defines the model. Here, a simple CFA model with no cross loading is specified*

*! with 6 factors (amotiv - intrin) defined respectively with items from the usevariable list.*

*! The name of the factors is selected by the user and comes before the "By" command.*

*! The "By" command indicates with items serve to define which factor.*

Model:

Amotiv by Am1 Am5 Am6;  
ExtMat by Emap1 Emap4 Emav4;  
ExtSoc by Esap2 Esap4 Esav1;  
Introj by Inap1 Inap2 Inav1 Inav2;  
Ident by Ident2 Ident3 Ident4;  
Intrin by Intrin2 Intrin4 Intrin6;

*! Specific sections of output are requested*

Output: sampstat stdyx mod res svalues;

Title: Bifactor CFA;

*! Common sections of inputs are skipped to focus only on changes in the MODEL section*  
*! The next statement defines the model. Here, a bifactor CFA model is*  
*! specified with 6 specific factors (amotiv - intrin) defined as in the CFA model.*  
*! All items are also used to define global factor called G.*

Model:

Amotiv by Am1 Am5 Am6;  
ExtMat by Emap1 Emap4 Emav4;  
ExtSoc by Esap2 Esap4 Esav1;  
Introj by Inap1 Inap2 Inav1 Inav2;  
Ident by Ident2 Ident3 Ident4;  
Intrin by Intrin2 Intrin4 Intrin6;

G by

Am1 Am5 Am6  
Esap2 Esap4 Esav1  
Emap1 Emap4 Emav4  
Inap1 Inap2 Inav1 Inav2  
Ident2 Ident3 Ident4  
Intrin2 Intrin4 Intrin6;

*! All factors are specified as orthogonal, with their correlations (WITH) constrained to be 0 (@0).*

ExtSoc with amotiv@0;  
ExtSoc with Extmat@0;  
ExtSoc with Introj@0;  
ExtSoc with Ident@0;  
ExtSoc with Intrin@0;  
Extmat with amotiv@0;  
ExtMat with Introj@0;  
ExtMat with Ident@0;  
ExtMat with Intrin@0;  
Introj with amotiv@0;  
Introj with Ident@0;  
Introj with Intrin@0;  
ident with amotiv@0;  
Ident with Intrin@0;  
Intrin with amotiv@0;  
g with amotiv@0;  
g with ExtSoc@0;  
g with ExtMat@0;  
g with Introj@0;  
g with Ident@0;  
g with Intrin@0;

Output: sampstat stdyx mod res svalues;

TITLE: 6 factor ESEM

*! Common sections of inputs are skipped to focus only on the ANALYSIS and MODEL sections.*

*! The Maximum Likelihood Robust (MLR) estimator is used together with the oblique target rotation.*

ANALYSIS:

ESTIMATOR = MLR; ROTATION = target;

*! The next statement defines the model. Here, an ESEM model is specified with target rotation.*

*! The 6 factors (amotiv - intrin) are defined respectively with main loadings from their respective items.*

*! In addition to these main loadings, all other cross-loadings are estimated but targeted*

*! to be as close to 0 as possible (~0). Factors forming a single set of ESEM factors (with cross-*

*! loadings between factors, are indicated by using the same label in parenthesis after \* (\*1).*

MODEL:

Amotiv BY Am1 Am5 Am6

Emap1~0 Emap4~0 Emav4~0

Esap2~0 Esap4~0 Esav1~0

Inap1~0 Inap2~0 Inav1~0 Inav2~0

Ident2~0 Ident3~0 Ident4~0

Intrin2~0 Intrin4~0 Intrin6~0 (\*1);

Ext\_mat by Emap1 Emap4 Emav4

Am1~0 Am5~0 Am6~0

Esap2~0 Esap4~0 Esav1~0

Inap1~0 Inap2~0 Inav1~0 Inav2~0

Ident2~0 Ident3~0 Ident4~0

Intrin2~0 Intrin4~0 Intrin6~0 (\*1);

Ext\_soc by Esap2 Esap4 Esav1

Am1~0 Am5~0 Am6~0

Emap1~0 Emap4~0 Emav4~0

Inap1~0 Inap2~0 Inav1~0 Inav2~0

Ident2~0 Ident3~0 Ident4~0

Intrin2~0 Intrin4~0 Intrin6~0 (\*1);

Introj by Inap1 Inap2 Inav1 Inav2

Am1~0 Am5~0 Am6~0

Emap1~0 Emap4~0 Emav4~0

Esap2~0 Esap4~0 Esav1~0

Ident2~0 Ident3~0 Ident4~0

Intrin2~0 Intrin4~0 Intrin6~0 (\*1);

Ident by Ident2 Ident3 Ident4

Am1~0 Am5~0 Am6~0

Emap1~0 Emap4~0 Emav4~0

Esap2~0 Esap4~0 Esav1~0

Inap1~0 Inap2~0 Inav1~0 Inav2~0

Intrin2~0 Intrin4~0 Intrin6~0 (\*1);

Intrin by Intrin2 Intrin4 Intrin6

Am1~0 Am5~0 Am6~0

Emap1~0 Emap4~0 Emav4~0

Esap2~0 Esap4~0 Esav1~0

```

Inap1~0 Inap2~0 Inav1~0 Inav2~0
Ident2~0 Ident3~0 Ident4~0 (*1);
Output: sampstat stdyx mod res svalues;
TITLE: Bifactor-ESEM (measurement model)
! Common sections of inputs are skipped to focus only on the ANALYSIS and MODEL
sections.
! The next section defines the analysis. Here the Maximum Likelihood Robust (MLR)
estimator is used
! together with orthogonal bifactor target rotation (making all factors orthogonal as in
Bifactor-CFA).
ANALYSIS:
ESTIMATOR = MLR; ROTATION = target (orthogonal);
! The next statement defines the model. Here, an ESEM model is specified with target
rotation.
! The 6 factors (amotiv - intrin) are defined respectively with main loadings from their
respective items.
! In addition to these main loadings, all other cross-loadings are estimated but targeted
! to be as close to 0 as possible (~0). All items are also used to define one global factor
(called G).
! Factors forming a single set of ESEM factors (with cross- loadings between factors,
! are indicated by using the same label in parenthesis after * (*1).
MODEL:
G by Am1 Am5 Am6
    Esap2 Esap4 Esav1
    Emap1 Emap4 Emav4
    Inap1 Inap2 Inav1 Inav2
    Ident2 Ident3 Ident4
    Intrin2 Intrin4 Intrin6 (*1);
Amotiv BY Am1 Am5 Am6
    Emap1~0 Emap4~0 Emav4~0
    Esap2~0 Esap4~0 Esav1~0
    Inap1~0 Inap2~0 Inav1~0 Inav2~0
    Ident2~0 Ident3~0 Ident4~0
    Intrin2~0 Intrin4~0 Intrin6~0 (*1);
Ext_mat by Emap1 Emap4 Emav4
    Am1~0 Am5~0 Am6~0
    Esap2~0 Esap4~0 Esav1~0
    Inap1~0 Inap2~0 Inav1~0 Inav2~0
    Ident2~0 Ident3~0 Ident4~0
    Intrin2~0 Intrin4~0 Intrin6~0 (*1);
Ext_soc by Esap2 Esap4 Esav1
    Am1~0 Am5~0 Am6~0
    Emap1~0 Emap4~0 Emav4~0
    Inap1~0 Inap2~0 Inav1~0 Inav2~0
    Ident2~0 Ident3~0 Ident4~0
    Intrin2~0 Intrin4~0 Intrin6~0 (*1);
Introj by Inap1 Inap2 Inav1 Inav2
    Am1~0 Am5~0 Am6~0
    Emap1~0 Emap4~0 Emav4~0
    Esap2~0 Esap4~0 Esav1~0

```

```

Ident2~0 Ident3~0 Ident4~0
Intrin2~0 Intrin4~0 Intrin6~0 (*1);
Ident by Ident2 Ident3 Ident4
Am1~0 Am5~0 Am6~0
Emap1~0 Emap4~0 Emav4~0
Esap2~0 Esap4~0 Esav1~0
Inap1~0 Inap2~0 Inav1~0 Inav2~0
Intrin2~0 Intrin4~0 Intrin6~0 (*1);
Intrin by Intrin2 Intrin4 Intrin6
Am1~0 Am5~0 Am6~0
Emap1~0 Emap4~0 Emav4~0
Esap2~0 Esap4~0 Esav1~0
Inap1~0 Inap2~0 Inav1~0 Inav2~0
Ident2~0 Ident3~0 Ident4~0 (*1);
Output: sampstat stdyx mod res svalues;

```

TITLE: Bifactor ESEM with covariates relations with all factors freely estimated  
*! Common sections of inputs are skipped to focus only on the USEVARIABLE, ANALYSIS and MODEL*  
*! sections. Variables autonomy, competence, relatedness, affective commitment (AC), and continuance*  
*! commitment (CC) have been added to this analysis in the use variable section.*  
 Usevariable are  
 Am1 Am5 Am6 Emap1 Emap4 Emav4  
 Esap2 Esap4 Esav1 Inap1 Inap2 Inav1 Inav2  
 Ident2 Ident3 Ident4 Intrin2 Intrin4 Intrin6  
 Autonomy Competence Relatedness AC CC ;  
*! The next section defines the analysis. Here the Maximum Likelihood Robust (MLR) estimator is used*  
*! together with the orthogonal bifactor target rotation.*  
 Analysis:  
 ESTIMATOR = MLR; ROTATION = target (orthogonal);  
 Model:  
**![...] The first section of the model is identical to the previous example.**  
*! The following ON statement specifies estimation of regressions between S-factors (amotiv – to intrin)*  
*! and G-factor and covariates (Autonomy, Competence, Relatedness, AC, and CC).*  
 AC CC Autonomy Competence Relatedness ON Amotiv ExtMat ExtSoc Introj Ident Intrin  
 G ;

TITLE: Bifactor ESEM with ESEM-within-CFA with covariates relations with the S-factors constrained to be zero

*! ANALYSIS and MODEL sections only*

Analysis: estimator is MLR;

*! Start values in the following section are obtained through estimation of the bifactor-ESEM measurement*

*! model requesting the "svalues" section of the output.*

*! Using these values is required to relax some constraints of ESEM and Bifactor-ESEM. For instance*

*! in ESEM and Bifactor-ESEM, all factors need to present the same patterns of freely estimated relations*

*! to covariates. Here, the ESEM-within-CFA approach is required to constrain the relations between the*

*! S-factors (but not the G-factor) and the covariates to be zero.*

*! In ESEM-within-CFA, one referent indicator is selected for each factor (including the G-factor) and all*

*! cross loadings for this indicators are constrained (@) to take exactly the value it had in the freely*

*! estimated model. All other loadings and cross loadings are given a start value corresponding to*

*! their values (\*) from the freely estimated model. All factor variances are constrained to be 1 (@1).*

*! For a bifactor model, all factor correlations are also constrained to be 0 (@0).*

Model:

g BY am1@-0.39263;  
g BY am5\*-0.33615;  
g BY am6\*-0.33080;  
g BY esap2@0.38216;  
g BY esap4\*0.33666;  
g BY esav1\*0.03294;  
g BY emap1@0.49898;  
g BY emap4\*0.31362;  
g BY emav4\*-0.14727;  
g BY inap1\*0.63006;  
g BY inap2\*0.90622;  
g BY inav1@0.57699;  
g BY inav2\*0.48894;  
g BY ident2\*0.77973;  
g BY ident3\*1.31872;  
g BY ident4@1.28983;  
g BY intrin2\*1.14160;  
g BY intrin4@1.14395;  
g BY intrin6\*1.12897;

Amotiv BY am1\*0.68981;  
amotiv BY am5\*0.65837;  
amotiv BY am6\*0.65592;  
amotiv BY emap1@0.22037;  
amotiv BY emap4\*0.19998;  
amotiv BY emav4\*0.00300;

amotiv BY esap2@0.15847;  
amotiv BY esap4\*0.17431;  
amotiv BY esav1\*0.11986;  
amotiv BY inap1\*0.05677;  
amotiv BY inap2\*-0.07635;  
amotiv BY inav1@0.17945;  
amotiv BY inav2\*0.01314;  
amotiv BY ident2\*-0.14293;  
amotiv BY ident3\*0.07663;  
amotiv BY ident4@0.08610;  
amotiv BY intrin2@-0.06071;  
amotiv BY intrin4@-0.08090;  
amotiv BY intrin6\*-0.07964;

extmat BY emap1\*1.53774;  
extmat BY emap4\*0.84067;  
extmat BY emav4\*1.13499;  
extmat BY am1@0.09013;  
extmat BY am5\*0.10347;  
extmat BY am6\*0.06301;  
extmat BY esap2@0.40790;  
extmat BY esap4\*0.32382;  
extmat BY esav1\*0.45489;  
extmat BY inap1\*0.18847;  
extmat BY inap2\*0.05461;  
extmat BY inav1@0.24750;  
extmat BY inav2\*0.06022;  
extmat BY ident2\*0.02634;  
extmat BY ident3\*0.00048;  
extmat BY ident4@-0.01833;  
extmat BY intrin2@-0.07773;  
extmat BY intrin4@-0.04074;  
extmat BY intrin6\*-0.10479;

extsoc BY esap2\*1.13210;  
extsoc BY esap4\*1.09945;  
extsoc BY esav1\*1.08788;  
extsoc BY am1@0.08105;  
extsoc BY am5\*0.04667;  
extsoc BY am6\*0.12917;  
extsoc BY emap1@0.11155;  
extsoc BY emap4\*0.58741;  
extsoc BY emav4\*0.61396;  
extsoc BY inap1\*0.54434;  
extsoc BY inap2\*0.08778;  
extsoc BY inav1@0.35970;  
extsoc BY inav2\*0.10321;  
extsoc BY ident2\*-0.02858;  
extsoc BY ident3\*-0.06371;  
extsoc BY ident4@-0.06996;

extsoc BY intrin2@-0.11342;  
extsoc BY intrin4@-0.03684;  
extsoc BY intrin6\*-0.04847;

introj BY inap1\*0.73127;  
introj BY inap2\*0.48896;  
introj BY inav1\*1.12825;  
introj BY inav2\*1.06249;  
introj BY am1@0.01224;  
introj BY am5\*0.00518;  
introj BY am6\*0.06226;  
introj BY emap1@-0.13351;  
introj BY emap4\*0.23147;  
introj BY emav4\*0.41822;  
introj BY esap2@0.14887;  
introj BY esap4\*0.25184;  
introj BY esav1\*0.38897;  
introj BY ident2\*0.43978;  
introj BY ident3\*-0.16744;  
introj BY ident4@0.02386;  
introj BY intrin2@-0.07868;  
introj BY intrin4@-0.02557;  
introj BY intrin6\*-0.13357;

ident BY ident2\*0.37232;  
ident BY ident3\*0.42740;  
ident BY ident4\*0.59507;  
ident BY am1@-0.04921;  
ident BY am5\*0.03338;  
ident BY am6\*0.01853;  
ident BY emap1@-0.61895;  
ident BY emap4\*0.15928;  
ident BY emav4\*0.68637;  
ident BY esap2@-0.16523;  
ident BY esap4\*-0.02558;  
ident BY esav1\*0.10667;  
ident BY inap1\*0.06167;  
ident BY inap2\*0.12079;  
ident BY inav1@0.12381;  
ident BY inav2\*-0.03615;  
ident BY intrin2@-0.00746;  
ident BY intrin4@0.03462;  
ident BY intrin6\*0.05258;

intrin BY intrin2@0.64995;  
intrin BY intrin4\*0.86685;  
intrin BY intrin6\*0.72335;  
intrin BY am1@-0.05503;  
intrin BY am5\*-0.00221;  
intrin BY am6\*-0.06204;

```

intrin BY emap1@-0.24644;
intrin BY emap4*-0.04727;
intrin BY emav4*0.14359;
intrin BY esap2@-0.04745;
intrin BY esap4*-0.08515;
intrin BY esav1*-0.04757;
intrin BY inap1*-0.05376;
intrin BY inap2*-0.02423;
intrin BY inav1@-0.11019;
intrin BY inav2*-0.09012;
intrin BY ident2*0.06175;
intrin BY ident3*0.06970;
intrin BY ident4@0.02096;

```

```

G-Intrin@1;
extmat WITH amotiv@0.00000;
extsoc WITH amotiv@0.00000;
extsoc WITH extmat@0.00000;
introj WITH amotiv@0.00000;
introj WITH extmat@0.00000;
introj WITH extsoc@0.00000;
ident WITH amotiv@0.00000;
ident WITH extmat@0.00000;
ident WITH extsoc@0.00000;
ident WITH introj@0.00000;
intrin WITH amotiv@0.00000;
intrin WITH extmat@0.00000;
intrin WITH extsoc@0.00000;
intrin WITH introj@0.00000;
intrin WITH ident@0.00000;
g WITH amotiv@0.00000;
g WITH extmat@0.00000;
g WITH extsoc@0.00000;
g WITH introj@0.00000;
g WITH ident@0.00000;
g WITH intrin@0.00000;

```

*! The following inputs specify G to be freely estimated in relation to covariates while constraining*

*! S-factors (amotv-intrin) to be unrelated to covariates.*

```

AC CC Autonomy Competence Relatedness ON Amotiv@0 ExtMat@0
ExtSoc@0 Introj@0 Ident@0 Intrin@0;
AC CC Autonomy Competence Relatedness ON G;
AC CC Autonomy Competence Relatedness;

```
